# Supplementary material
Source: PubMed Central journal article supplement (PMC1613196)

### **Supplemental Figure Legend**

**Supplement Figure 1. Increased mean vascular density (MVD) in tumors implanted in  $SP^{-/-}$  mice.** ID8 cells ( $10^6$  cells/0.5 ml PBS) were injected subcutaneously in the flank of  $SP^{-/-}$  and  $SP^{+/+}$  mice. Tumor growth was monitored for 10 weeks, at the end of which tumors were excised and processed for immunostaining using rat anti-mouse CD31 endothelial marker (A). The MVD of the tumors were determined by counting CD31-positive areas in 10 fields/serial tumor sections from 5 animals *per* group (B). The results are expressed as the mean  $\pm$  SEM (\* $P < 0.05$ ).

**Supplement Figure 2. ID8 cells express VEGF and VEGFRs.** The steady state expression of VEGF and VEGF receptors was assessed in ID8 cells by semi-quantitative RT-PCR. ID8 cells express VEGF isoforms (mainly VEGF164 and to a lesser extent VEGF122 and 180), VEGFR1 (flt-1), and neuropilin-1 (Npn1). VEGFR2 (flk-1) was not detected. The results shown are representative of 3 independent experiments.

**Supplement Figure 3. Augmented expression of VEGF and VEGFRs in ID8 intraperitoneal tumors.** Immunostaining of peritoneal tumor sections from  $SP^{+/+}$  and  $SP^{-/-}$  animals revealed that VEGF is highly expressed in  $SP^{-/-}$ , compared to  $SP^{+/+}$  tumors. Similarly, the expression of VEGFR1 and VEGFR2 was more abundant in  $SP^{-/-}$ , in the cytoplasm as well as cell surfaces (magnification 400x). Staining results shown are representative of at least 3 randomly-selected areas from serial sections of tumors from 3 different animals.

**A**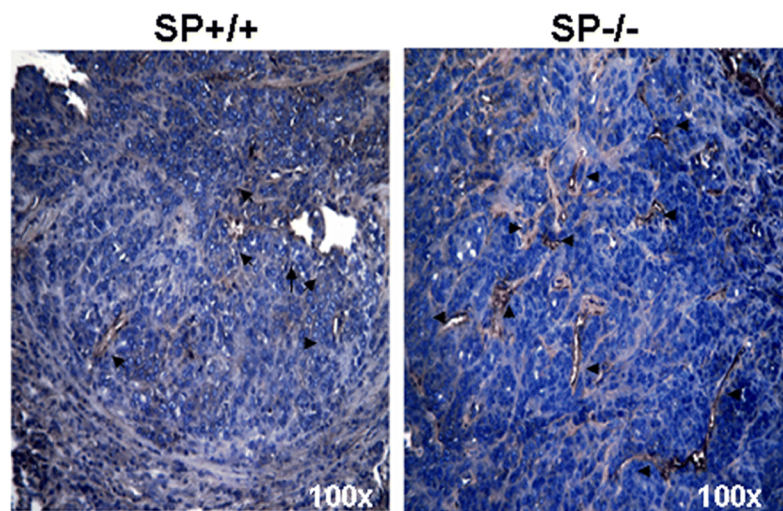**B**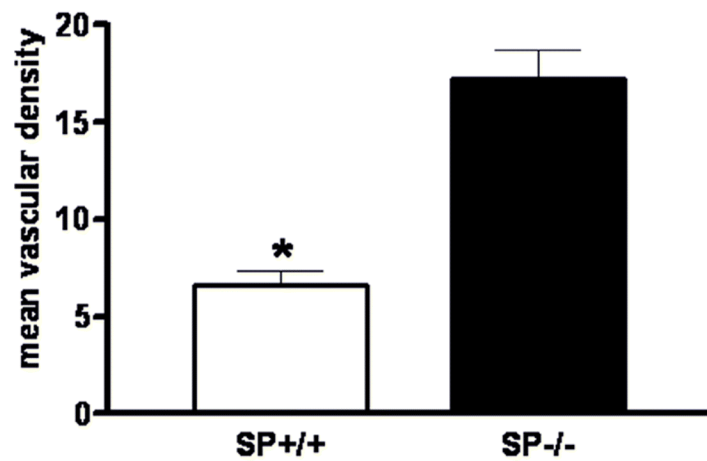

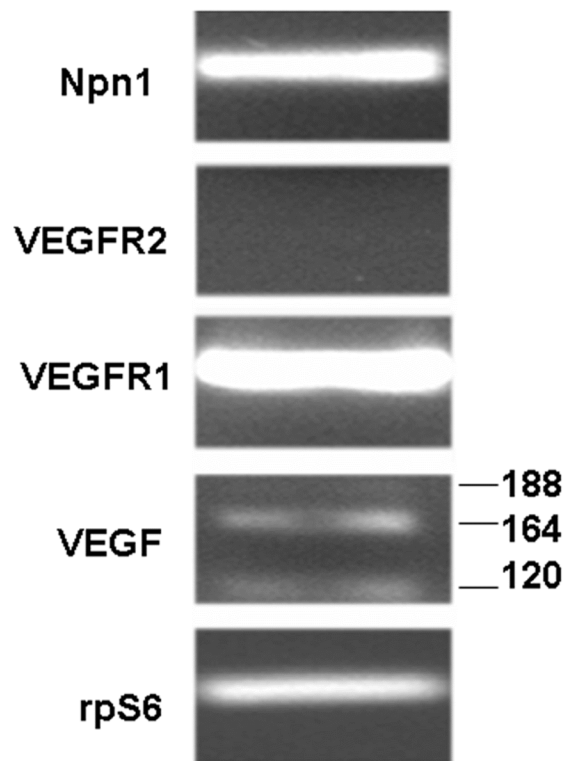

SP+/+

SP-/-

VEGF

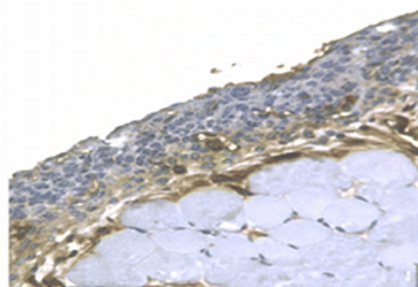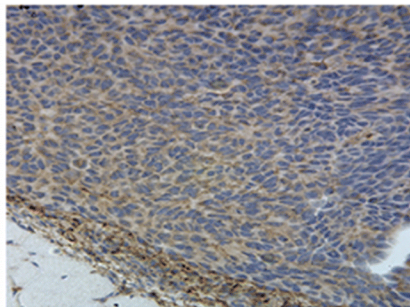

VEGFR1

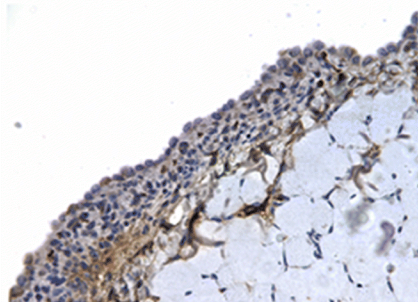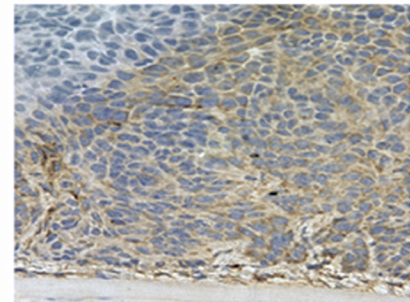

VEGFR2

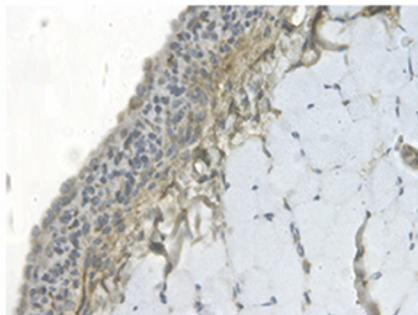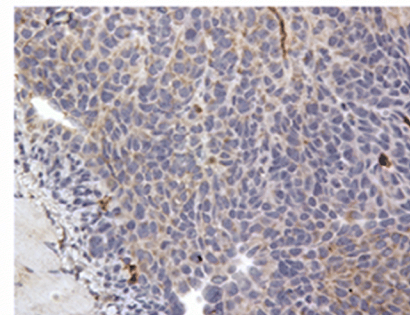

Supplement: amjpathol_167_6_1739__1.pdf [file amjpathol_167_6_1739__1.pdf]
